# Supplementary material
Source: Springer Nature journal article supplement (https://www.springermedizin.de/resource/supplementary/12955_2013_1220_MOESM1_ESM.pdf/9559088)
Supplement: MOESM1 [file 9559088]

## Additional File 1: Definition of comorbidity clusters

**Cancer:** breast cancer, cervical cancer, colorectal cancer, leukemia, lymphoma, melanoma, metastatic solid tumor, non-small cell lung cancer, prostate cancer, small cell lung cancer, skin cancer, uterine cancer, and other cancer

**Gastrointestinal:** gastroesophageal reflux disease, heartburn, abdominal pain, abdominal bloating, irritable bowel syndrome, Crohn's disease, ulcerative colitis, ulcer disease, ulcers (active stomach or duodenal), and frequent diarrhea

**Infectious:** hepatitis B, hepatitis C, HIV, AIDS,

**Arthritis:** rheumatoid arthritis, osteoarthritis

**Psychiatric:** depression, anxiety, generalized anxiety disorder, panic disorder, social anxiety disorder, post-traumatic stress disorder, bipolar disorder, phobias, obsessive compulsive disorder, and attention deficit disorder

**Respiratory:** asthma, chronic bronchitis, emphysema, chronic obstructive pulmonary disease, allergies, hay fever, and pulmonary embolism

**Renal disease:** chronic kidney disease, moderate or severe renal disease

**Liver disease:** cirrhosis

**Diabetes**

**Cardiovascular disease:** hypertension, hyperlipidemia, angina pectoris, arrhythmia, congestive heart failure, and atherosclerosis

**Cerebrovascular disease:** stroke or mini-stroke/transient ischemic attack
